# Supplementary material for: Synthesis of a UiO-66/g-C3N4 composite using terephthalic acid obtained from waste plastic for the photocatalytic degradation of the chemical warfare agent simulant, methyl paraoxon
Source: Royal Society of Chemistry journal article supplement (doi:10.1039/d2ra03483b), 2022-01-01
Supplement: d2ra03483b1.pdf [file d2ra03483b1.pdf]

Electronic Supplementary Information (ESI) for

**Synthesis of a UiO-66/g-C<sub>3</sub>N<sub>4</sub> composite using terephthalic acid obtained from waste plastic for the photocatalytic degradation of chemical warfare agent simulant, methyl paraoxon**

Dung Van Le<sup>a,b</sup>, Manh B. Nguyen<sup>c\*</sup>, Phuong T. Dang<sup>c</sup>, Taeyoon Lee<sup>d\*</sup>, Trinh Duy Nguyen<sup>a,d\*</sup>

<sup>a</sup>Graduate University of Science and Technology, Academy of Science and Technology, 18 Hoang Quoc Viet Street, Cau Giay, Ha Noi, Vietnam.

<sup>b</sup>Center for Technology Environmental Treatment, 282 Lac Long Quan Street, Tay Ho, Ha Noi, Vietnam

<sup>c</sup>Institute of Chemistry, Vietnam Academy of Science and Technology, 18 Hoang Quoc Viet Street, Cau Giay, Ha Noi, Vietnam.

<sup>d</sup>Department of Environmental Engineering, College of Environmental and Marine, Pukyong National University, 45 Yongso-ro, Nam-gu, Busan, 48513, Republic of Korea

<sup>e</sup>Institute of Applied Technology and Sustainable Development, Nguyen Tat Thanh University, Ho Chi Minh City, Vietnam

**Corresponding author:** [nguyenbamanh@ich.vast.vn](mailto:nguyenbamanh@ich.vast.vn) (Manh B. Nguyen), [badger74w@pknu.ac.kr](mailto:badger74w@pknu.ac.kr) (Taeyoon Lee) and [ndtrinh@ntt.edu.vn](mailto:ndtrinh@ntt.edu.vn) (Trinh Duy Nguyen).

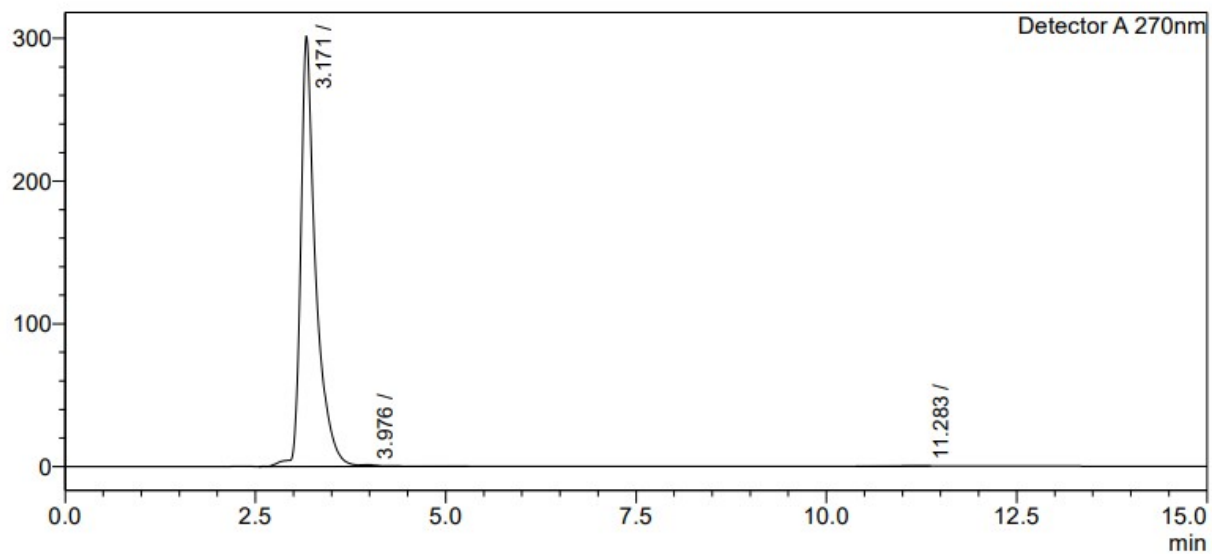

Fig. S1. HPLC spectrum of H<sub>2</sub>BDC product.

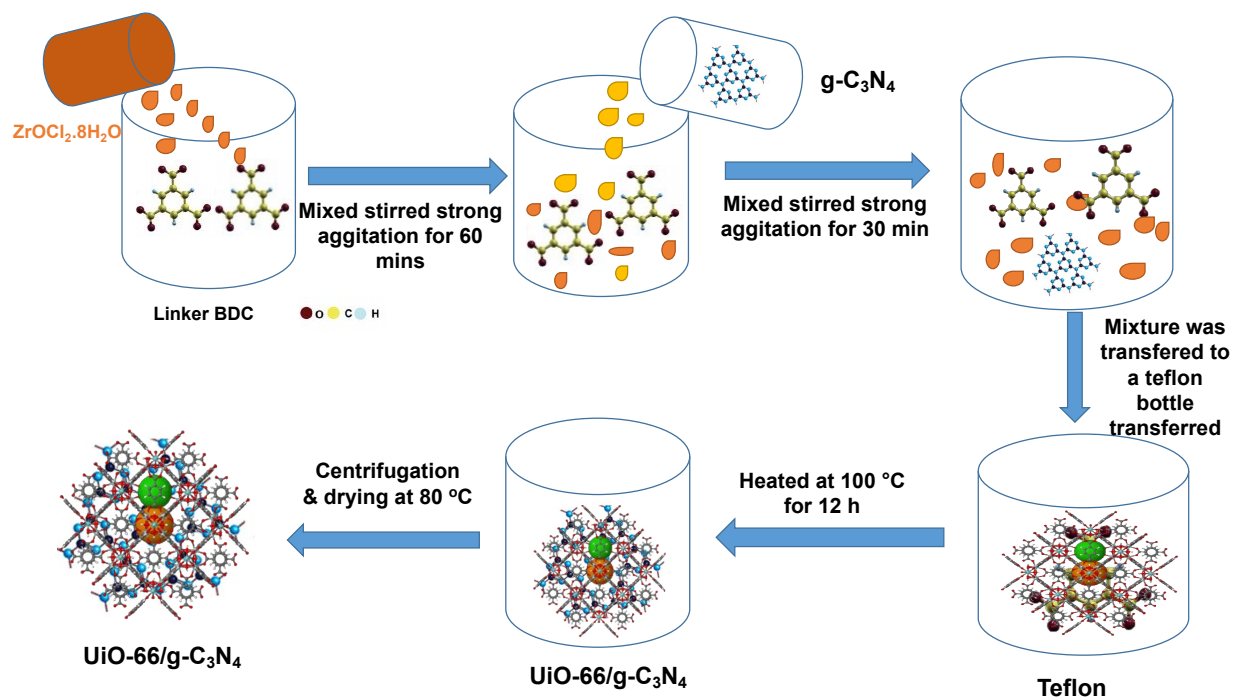

Fig. S2. Schematic synthesis of UiO-66/g-C<sub>3</sub>N<sub>4</sub> materials by solvothermal method

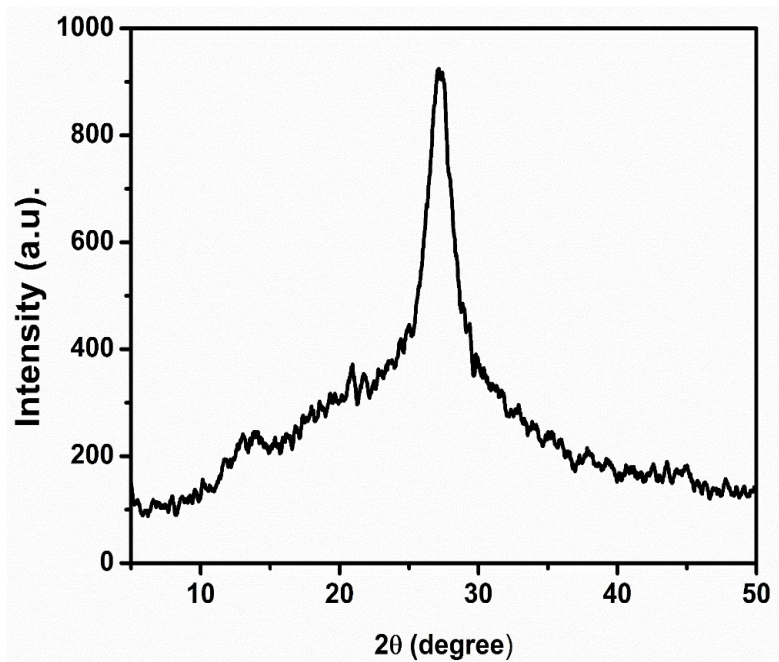

Fig. S3. XRD pattern of g-C<sub>3</sub>N<sub>4</sub> sample

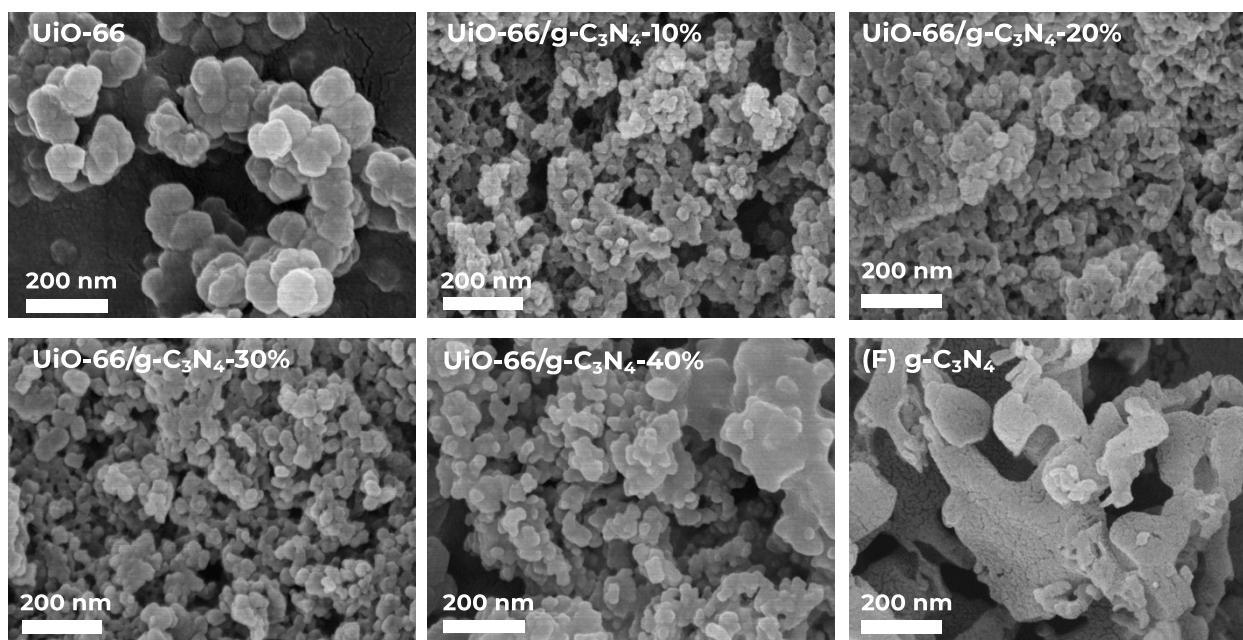

Fig. S4. SEM images of g-C<sub>3</sub>N<sub>4</sub>, UiO-66 and UiO-66/g-C<sub>3</sub>N<sub>4</sub> samples

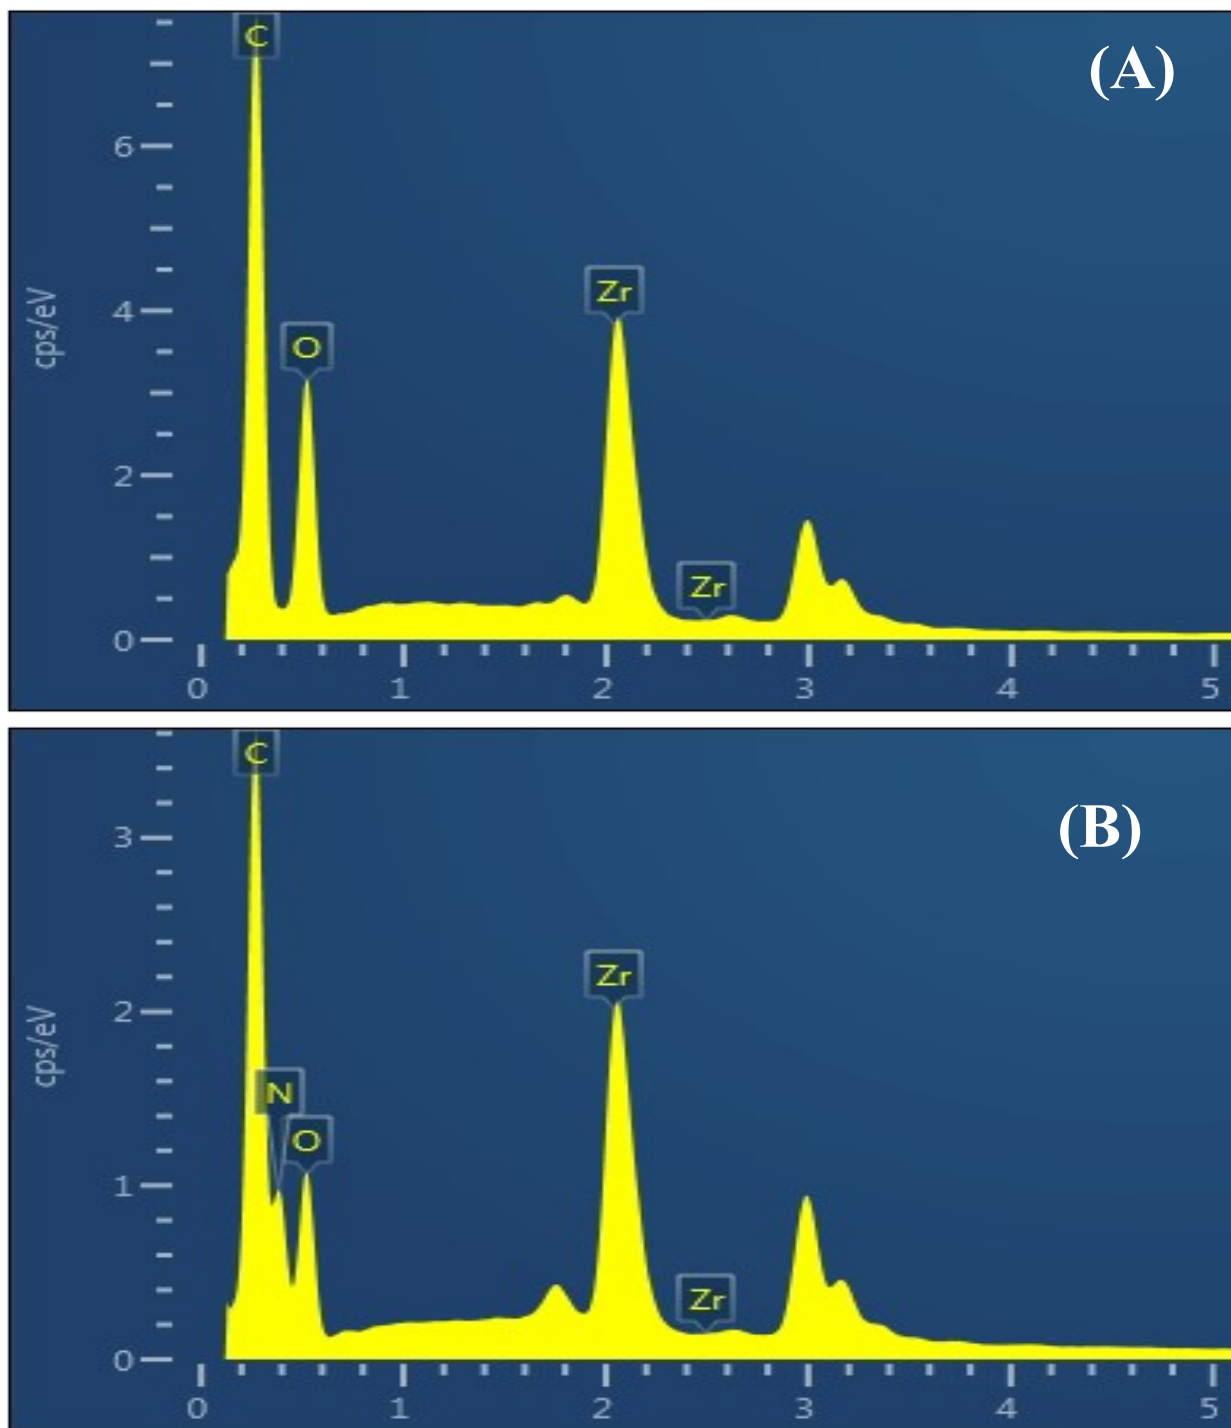

Fig. S5. (A) EDS spectra of UiO-66 and (B) UiO-66/g-C<sub>3</sub>N<sub>4</sub>-30 (B) samples

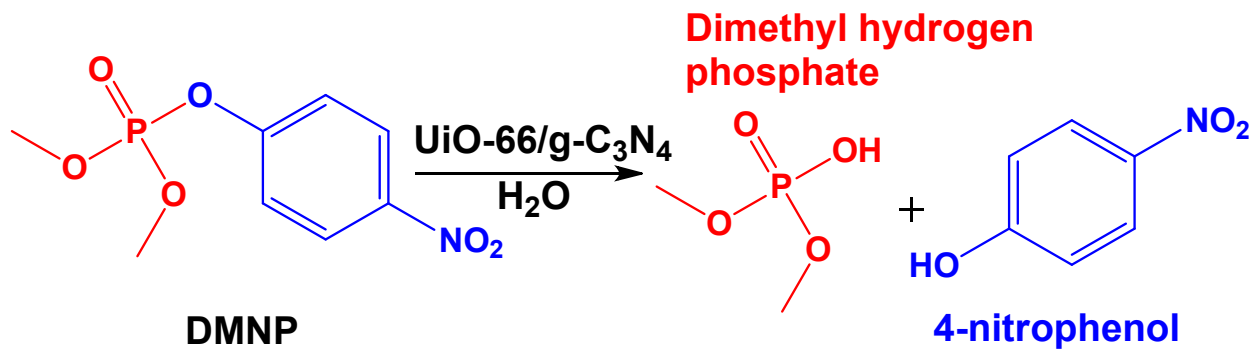

Fig. S6. Degradation of DMNP by UiO-66 and UiO-66/g-C<sub>3</sub>N<sub>4</sub>

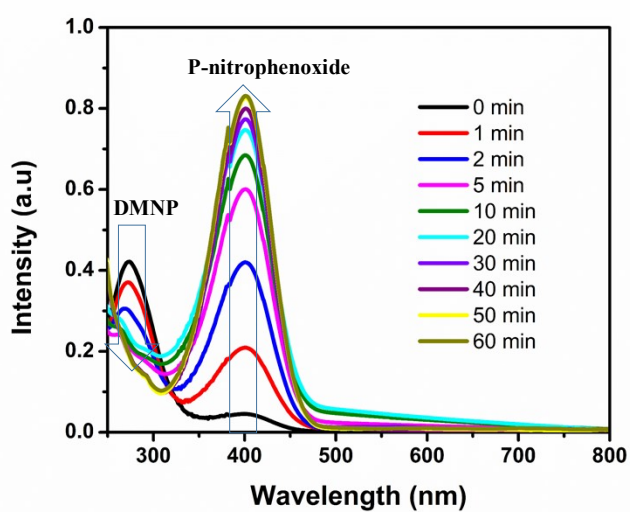

Fig. S7. UV-Vis spectra the degradation of DMNP using UiO-66/g-C<sub>3</sub>N<sub>4</sub>-30% sample.

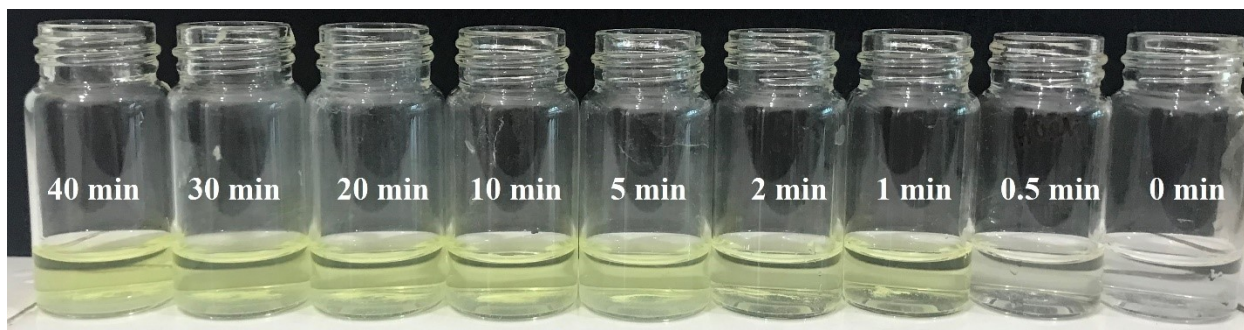

Fig. S8. Images of DMNP samples in 0.15M N-ethylmorpholine buffer at different times

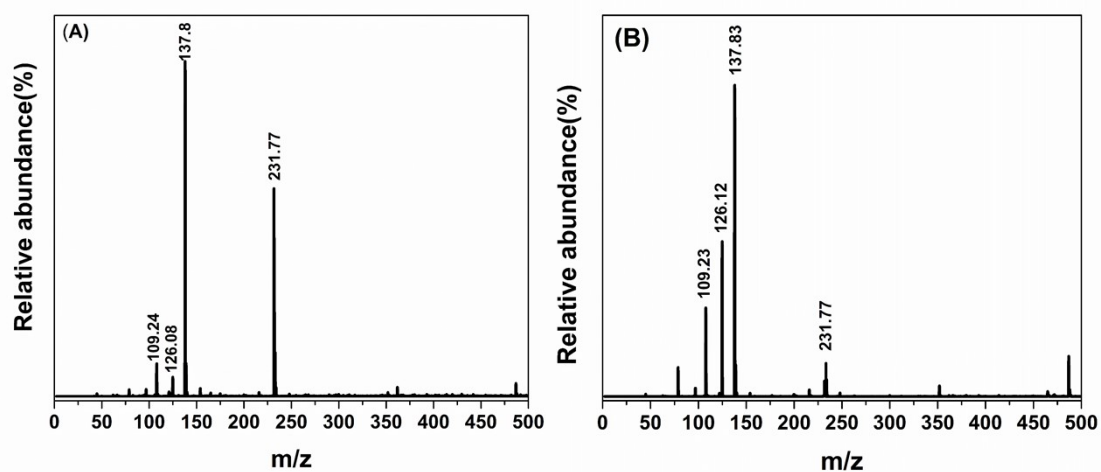

Fig. S9. LC-mass spectra of DMNP (a) UiO-66 in water, pH of 7, in the dark, (b) UiO-66/g-C<sub>3</sub>N<sub>4</sub>-30% in water, pH of 7 and visible light irradiation

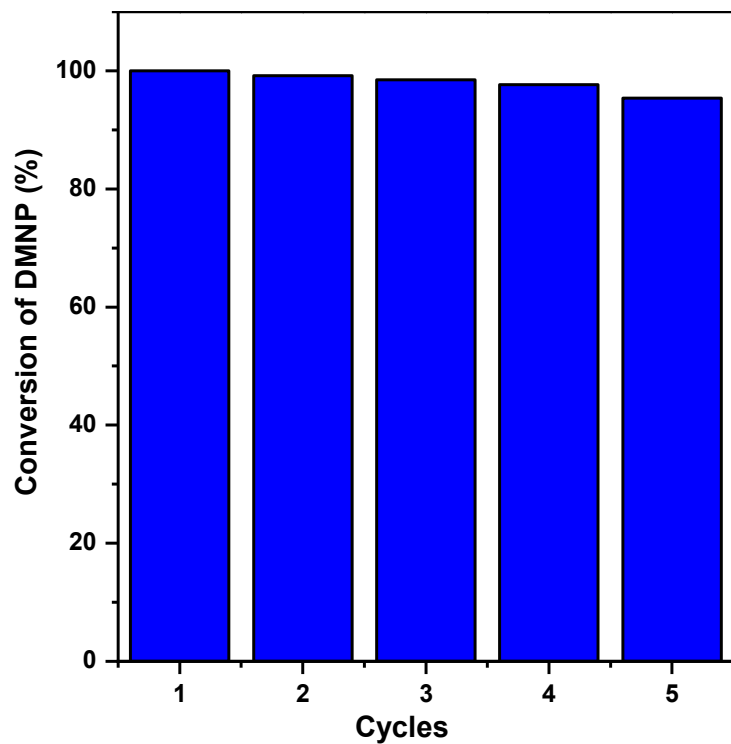

Fig. S10. Stability of catalytic activity over UiO-66/g-C<sub>3</sub>N<sub>4</sub>-30% at different cycles of reaction

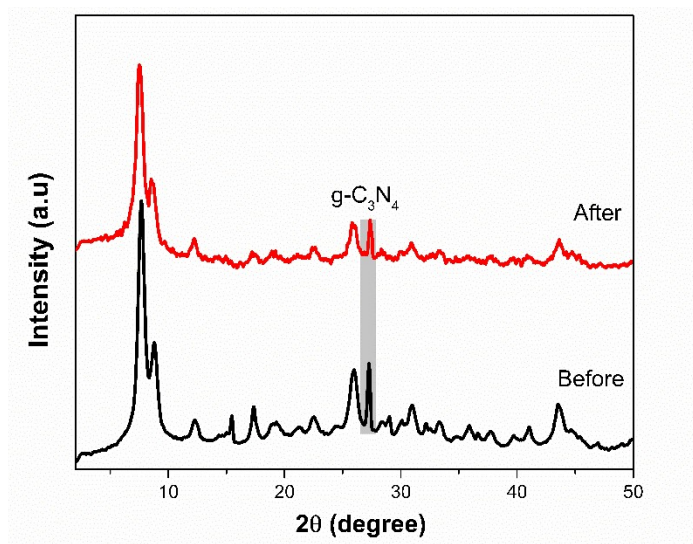

Fig. S11. XRD patterns of UiO-66/g-C<sub>3</sub>N<sub>4</sub>-30% photocatalyst before and after reaction.

Table 1S. Element composition of UiO-66 and UiO-66/g-C<sub>3</sub>N<sub>4</sub>-30% samples.

| Elements | UiO-66 | UiO-66/g-C <sub>3</sub> N <sub>4</sub> -30% |
|----------|--------|---------------------------------------------|
| C        | 47.60  | 43.18                                       |
| O        | 24.38  | 18.13                                       |
| Zr       | 28.02  | 21.47                                       |
| N        | -      | 17.22                                       |
| Total    | 100    | 100                                         |

Table S2. Comparative results of DMNP removal by various heterogeneous materials

| Materials                                   | Môi trường, pH                 | Calculated<br>t <sub>1/2</sub> (min) | Ref.      |
|---------------------------------------------|--------------------------------|--------------------------------------|-----------|
| UiO-66                                      | N-ethylmorpholine (0.45 M), 10 | 40                                   | [1]       |
| UiO-66-NH <sub>2</sub>                      | N-ethylmorpholine (0.45 M), 10 | 2.8                                  | [2]       |
| PP/ZnO/UiO-66-NH <sub>2</sub>               | N-ethylmorpholine (0.45 M), 10 | 4.80                                 | [3]       |
| Zr-MOF/filter UiO-66-NH <sub>2</sub>        | N-ethylmorpholine (0.45 M), 10 | 2.40                                 | [4]       |
| Graphene/UiO-66-NH <sub>2</sub>             | N-ethylmorpholine (0.45 M), 10 | 1.6                                  | [5]       |
| NU-901/branched PEI                         | N-ethylmorpholine (0.45 M), 10 | <u>1.9</u>                           | [6]       |
| UiO-66                                      | Water, 7                       | 7                                    | [7]       |
| Graphene/UiO-66-NH <sub>2</sub>             | Water, 7                       | 60                                   | [5]       |
| UiO-66/g-C <sub>3</sub> N <sub>4</sub> -30% | Water, 7                       | 2.17                                 | This work |



## References

- [1] M.J. Katz, J.E. Mondloch, R.K. Totten, J.K. Park, S.T. Nguyen, O.K. Farha, J.T. Hupp, Simple and compelling biomimetic metal-organic framework catalyst for the degradation of nerve agent simulants, *Angewandte Chemie - International Edition*. 53 (2014). <https://doi.org/10.1002/anie.201307520>.
- [2] J. Zhao, D.T. Lee, R.W. Yaga, M.G. Hall, H.F. Barton, I.R. Woodward, C.J. Oldham, H.J. Walls, G.W. Peterson, G.N. Parsons, Ultra-Fast Degradation of Chemical Warfare Agents Using MOF–Nanofiber Kebabs, *Angewandte Chemie - International Edition*. 55 (2016). <https://doi.org/10.1002/anie.201606656>.
- [3] D.T. Lee, J. Zhao, C.J. Oldham, G.W. Peterson, G.N. Parsons, UiO-66-NH<sub>2</sub> Metal-Organic Framework (MOF) Nucleation on TiO<sub>2</sub>, ZnO, and Al<sub>2</sub>O<sub>3</sub> Atomic Layer Deposition-Treated Polymer Fibers: Role of Metal Oxide on MOF Growth and Catalytic Hydrolysis of Chemical Warfare Agent Simulants, *ACS Applied Materials and Interfaces*. 9 (2017) 44847–44855. [https://doi.org/10.1021/ACSAMI.7B15397/SUPPL\\_FILE/AM7B15397\\_SI\\_001.PDF](https://doi.org/10.1021/ACSAMI.7B15397/SUPPL_FILE/AM7B15397_SI_001.PDF).
- [4] H. Liang, A. Yao, X. Jiao, C. Li, D. Chen, Fast and Sustained Degradation of Chemical Warfare Agent Simulants Using Flexible Self-Supported Metal-Organic Framework Filters, *ACS Applied Materials and Interfaces*. 10 (2018) 20396–20403. [https://doi.org/10.1021/ACSAMI.8B02886/SUPPL\\_FILE/AM8B02886\\_SI\\_001.PDF](https://doi.org/10.1021/ACSAMI.8B02886/SUPPL_FILE/AM8B02886_SI_001.PDF).
- [5] L. Song, T. Zhao, D. Yang, X. Wang, X. Hao, Y. Liu, S. Zhang, Z.Z. Yu, Photothermal graphene/UiO-66-NH<sub>2</sub> fabrics for ultrafast catalytic degradation of chemical warfare agent simulants, *Journal of Hazardous Materials*. 393 (2020). <https://doi.org/10.1016/j.jhazmat.2020.122332>.
- [6] Z. Chen, T. Islamoglu, O.K. Farha, Toward Base Heterogenization: A Zirconium Metal-Organic Framework/Dendrimer or Polymer Mixture for Rapid Hydrolysis of a Nerve-Agent Simulant, *ACS Applied Nano Materials*. 2 (2019) 1005–1008. [https://doi.org/10.1021/ACSANM.8B02292/SUPPL\\_FILE/AN8B02292\\_SI\\_001.PDF](https://doi.org/10.1021/ACSANM.8B02292/SUPPL_FILE/AN8B02292_SI_001.PDF).
- [7] D. Bužek, J. Demel, K. Lang, Zirconium Metal-Organic Framework UiO-66: Stability in an Aqueous Environment and Its Relevance for Organophosphate Degradation, *Inorganic Chemistry*. 57 (2018). <https://doi.org/10.1021/acs.inorgchem.8b02360>.
